# Supplementary material for: Catalytic Performances of Sn-Beta Catalysts Prepared from Different Heteroatom-Containing Beta Zeolites for the Retro-Aldol Fragmentation of Glucose
Source: MDPI journal article supplement (doi:10.3390/reactions3020020), 2022-05-12
Supplement: s1 [file s1]

Supporting Information:

**Catalytic performances of Sn-Beta catalysts prepared from different  
heteroatom-containing Beta zeolites for the retro aldol  
fragmentation of glucose**

Ricardo Navar,<sup>1</sup> Luca Botti<sup>2</sup>, Giulia Tarantino<sup>2</sup>, and Ceri Hammond<sup>2\*</sup>

<sup>1</sup>Cardiff Catalysis Institute, Cardiff University, Park Place, Cardiff, CF10 3AT, UK

<sup>2</sup>Department of Chemical Engineering, Imperial College London, London, SW7 2AZ, UK

\* [ceri.hammond@imperial.ac.uk](mailto:ceri.hammond@imperial.ac.uk)

**Table S1.** Principal modes and assignments of hydrothermal M-Beta zeolites.

| Zeolite     | Assignment (cm <sup>-1</sup> )            |                                               |                                          |                                         |                                                |                                        |                                         |
|-------------|-------------------------------------------|-----------------------------------------------|------------------------------------------|-----------------------------------------|------------------------------------------------|----------------------------------------|-----------------------------------------|
|             | $\nu$ O-T-O <sub>Int-T</sub> <sup>a</sup> | $\nu_{(s)}$ O-T-O <sub>Ext</sub> <sup>b</sup> | $\nu$ SiO <sub>4</sub> (UC) <sup>c</sup> | $\nu$ O-T-O <sub>Int</sub> <sup>d</sup> | $\nu_{(as)}$ O-T-O <sub>Ext</sub> <sup>e</sup> | $\nu$ SiOH <sub>Int</sub> <sup>f</sup> | $\nu$ SiOH <sub>Term</sub> <sup>g</sup> |
| Al-Beta 100 | 736                                       | ~800                                          | -                                        | 1042                                    | 1208                                           | -                                      | 3748                                    |
| B-Beta 100  | 737                                       | ~800                                          | 916<br>948                               | 1040                                    | 1209                                           | 3734                                   | 3747                                    |
| Ga-Beta 200 | 736                                       | ~800                                          | 942                                      | 1029                                    | 1209                                           | -                                      | 3748                                    |
| Al-Beta 200 | 737                                       | ~800                                          | 941                                      | 1039                                    | 1208                                           | -                                      | 3747                                    |
| B-Beta 200  | 736                                       | ~800                                          | 917                                      | 1033                                    | 1208                                           | 3733                                   | 3747                                    |
| Fe-Beta 200 | 736                                       | ~800                                          | -                                        | 1031                                    | 1207                                           | 3735                                   | 3748                                    |

[a] Intertetrahedral O-T-O; [b] Symmetric external O-T-O; [c] Vibrations of Si-O belonging to uncoupled SiO<sub>4</sub> tetrahedra [d] Symmetric internal O-T-O; [e] Asymmetric external O-T-O; [f]; Internal Si-OH groups present at framework defects; [h] Terminal Si-OH groups.

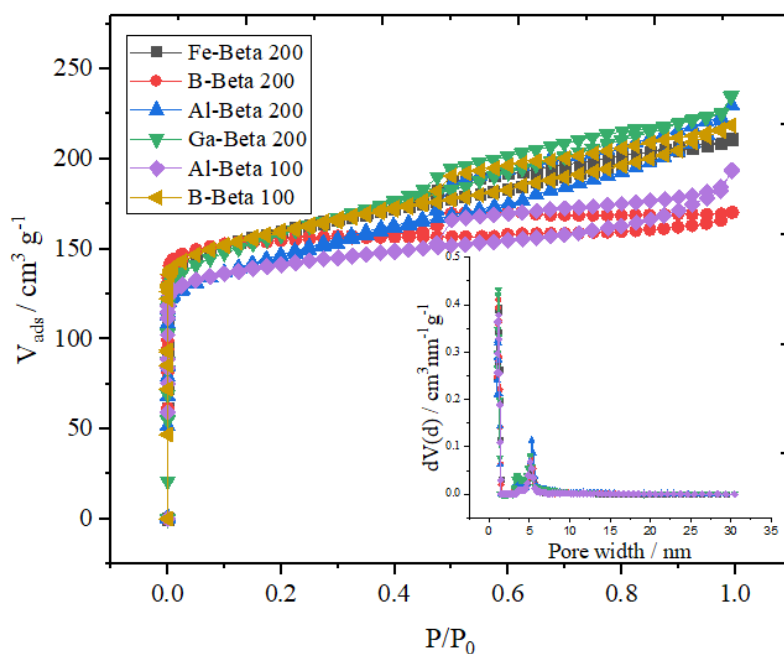

**Figure S1.** Nitrogen sorption isotherm and pore size distribution using DFT model (inset) of parent M-Beta zeolites.

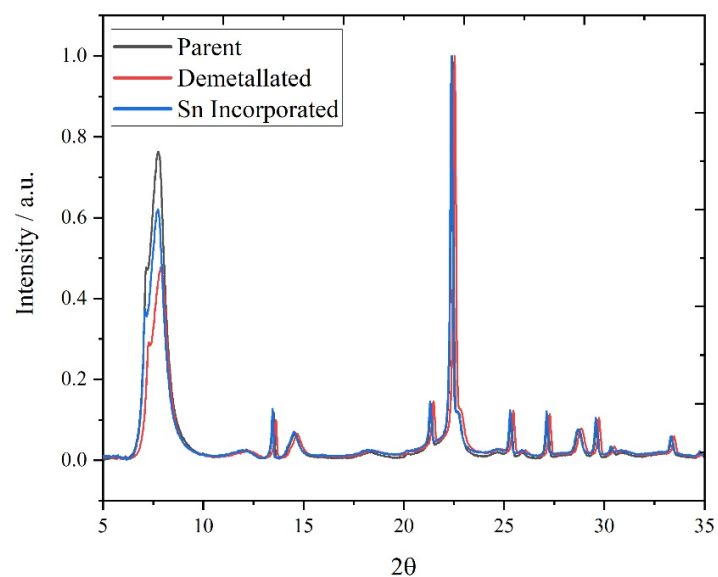

**Figure S2.** X-Ray Diffraction patterns of calcined B-Beta parent material, demetallated Beta derived from B-Beta, and Sn-Beta achieved by SSI of demetallated B-Beta.

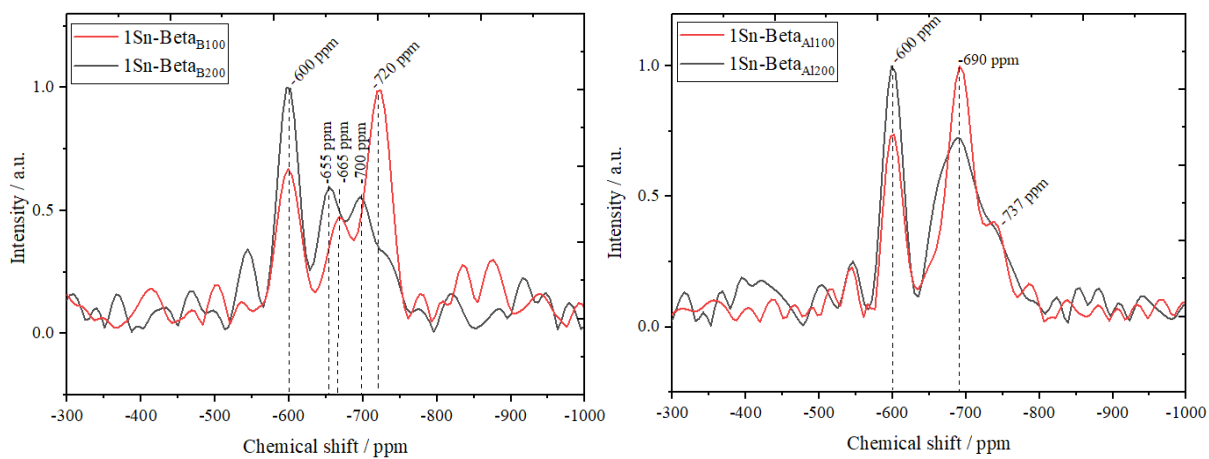

**Figure S3.**  $^{119}\text{Sn}$  De CPMG MAS NMR spectra of 1Sn-Beta<sub>100</sub> and 1Sn-Beta<sub>200</sub> where M=B(left) and M=Al (right).

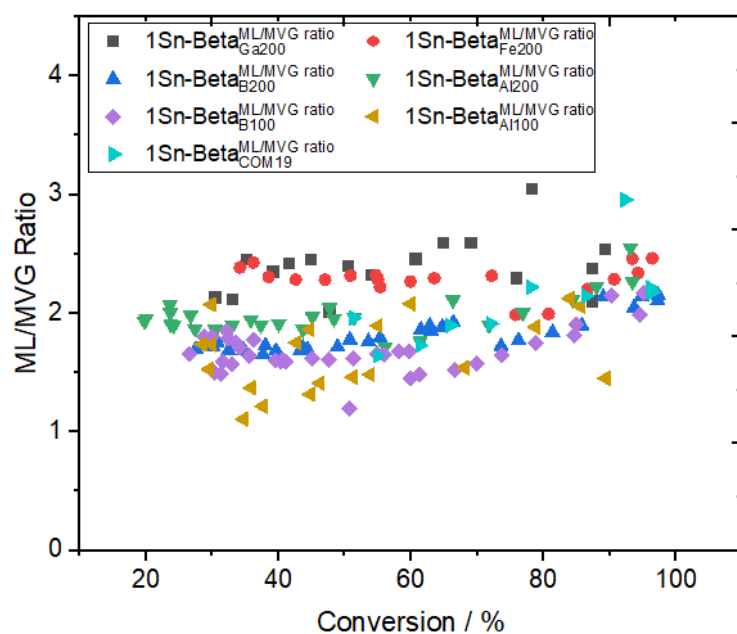

**Figure S4.** ML/MVG ratio over glucose conversion, for the 1Sn-Beta<sub>MX</sub> series and 1Sn-Beta<sub>COM19</sub>.

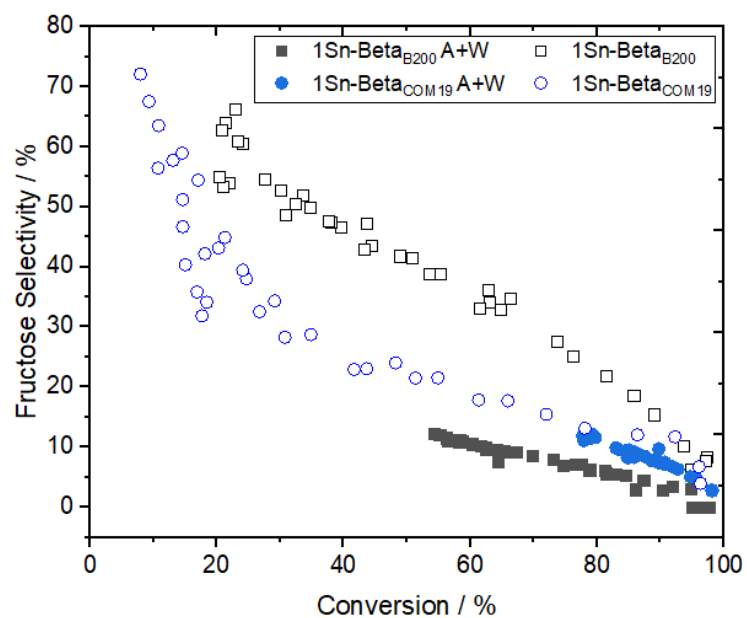

**Figure S5.** Comparison of the fructose selectivity over glucose conversion of original ML fragmentation and ML fragmentation with alkali salts and water (A+W).

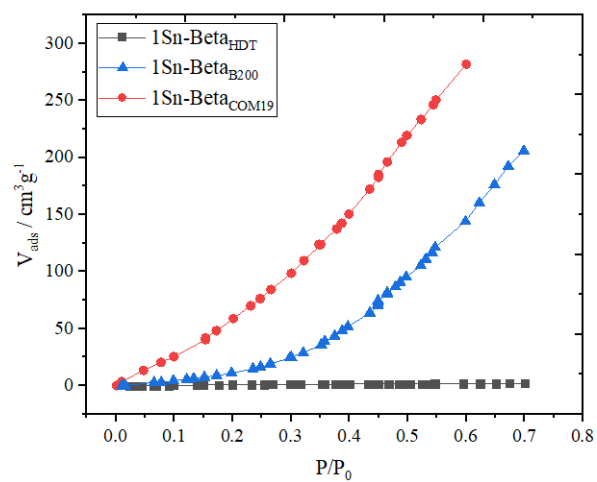

**Figure S6.** Vapour sorption data of various 1Sn-Beta catalysts, including (red/circles) 1Sn-Beta<sub>COM19</sub>, (blue/triangles) 1Sn-Beta<sub>B200</sub> and (squares/black) hydrothermally synthesised 1Sn-Beta<sub>HDT</sub>, which is provided for reference purposes only.
